# Supplementary material for: Genomic and transcriptomic profiles associated with response to eribulin and nivolumab combination in HER-2-negative metastatic breast cancer
Source: PubMed Central journal article supplement (PMC11303363; doi:10.1007/s00262-024-03782-7), 2024-08-06
Supplement: 262_2024_3782_MOESM1_ESM.pdf [file 262_2024_3782_MOESM1_ESM.pdf]

**SUPPLEMENTARY FIGURES**

**Supplementary Figure 1**

**a**

| PD-L1 Group | PFS6 rate | P-value |
|-------------|-----------|---------|
| Positive    | 31.3%     | 0.773   |
| Negative    | 38.3%     |         |

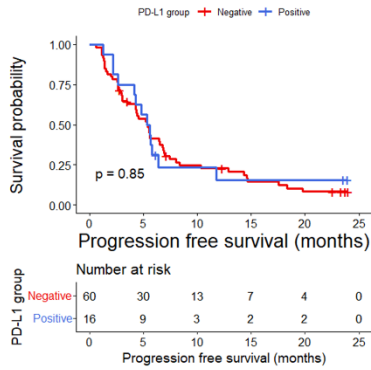

**b**

| PD-L1 Group | PFS6 rate | P-value |
|-------------|-----------|---------|
| Positive    | 26.7%     | 0.541   |
| Negative    | 73.3%     |         |

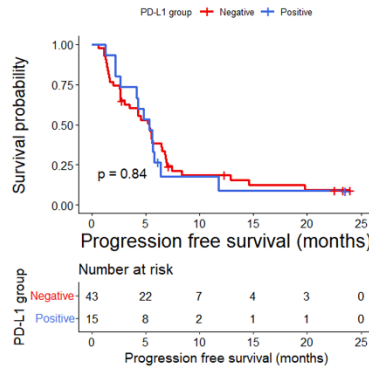

**c**

| TIL Group | PFS6 rate | P-value |
|-----------|-----------|---------|
| High      | 33.3%     | 0.643   |
| Low       | 33.3%     |         |
| Negative  | 44.4%     |         |

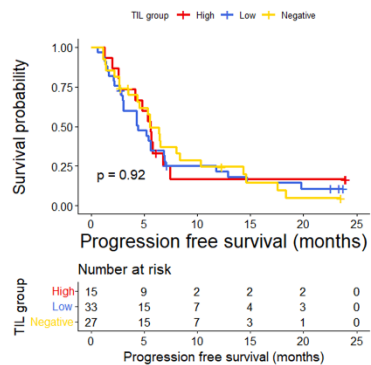

**d**

| TIL Group | PFS6 rate | P-value |
|-----------|-----------|---------|
| High      | 30.8%     | 1.0     |
| Low       | 34.6%     |         |
| Negative  | 36.8%     |         |

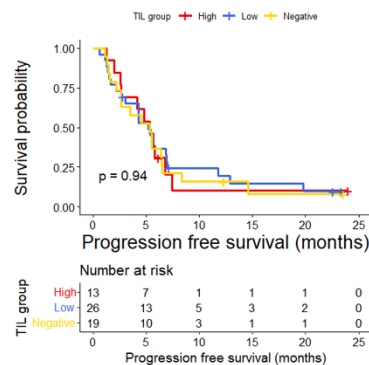

**Supplementary Figure 1.** Patient outcomes according to PD-L1 and TIL status

The upper tables show PFS6 rates, and the lower Kaplan-Meier curves show PFS. (a) WES cohort divided according to PD-L1 status (b) WTS cohort divided according to PD-L1 status. (c) WES cohort divided according to TIL status. (d) WTS cohort divided according to TIL status.

## Supplementary Figure 2

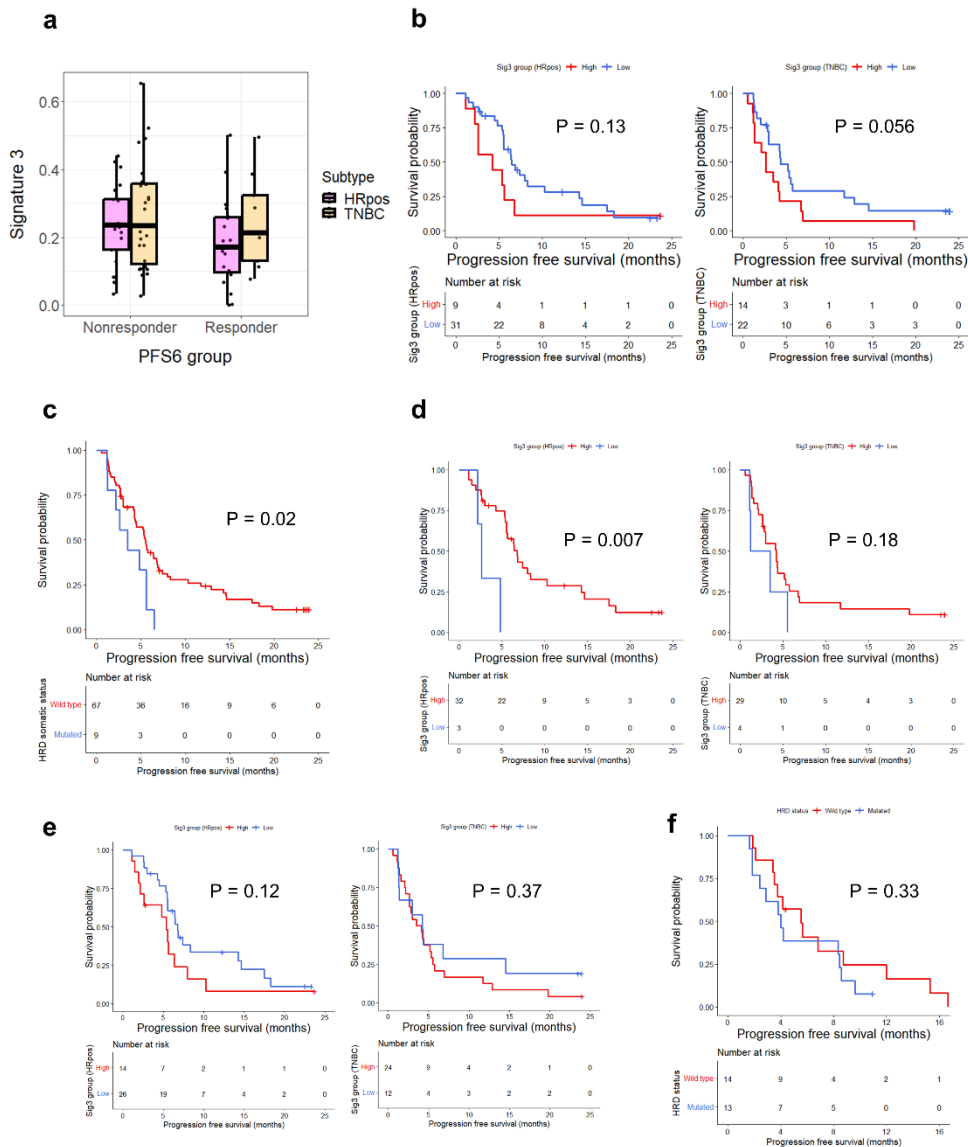

### Supplementary Figure 2. Outcomes according to HRD

(a) The boxplots show the proportion of signature 3 according to PFS6 group in each subtype. (b) Kaplan-Meier curves showing PFS according to Sig3 in HRpos and TNBC, respectively. (c) PFS according to somatic HRD mutation status in whole WES cohort. (d) PFS according to somatic HRD mutation status after excluding MMR defect patients in each subtype. (e) PFS according to HRD scores in each subtype (HRpos on the left, TNBC on the right). (f) PFS according to somatic HRD mutation status in external dataset.

### Supplementary Figure 3

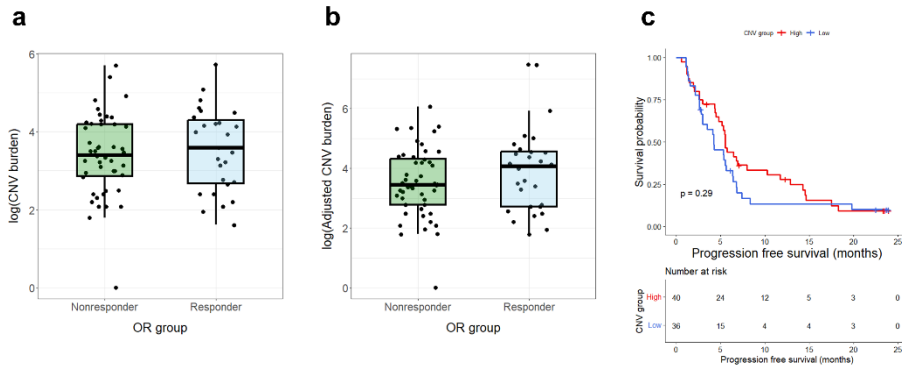

**Supplementary Figure 3.** Outcomes according to CNV burden

(a) The boxplots show the log values of CNV burden according to PFS6 group. (b) The boxplots show the log values of adjusted CNV burden according to PFS6 group. (c) Kaplan-Meier curves showing PFS according to Sig25 in the whole WES cohort.

## Supplementary Figure 4

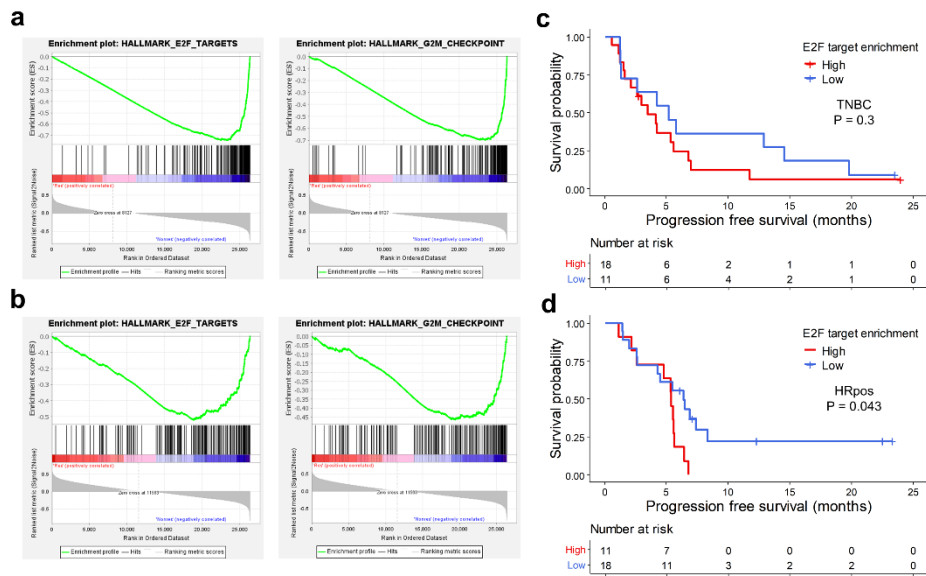

### Supplementary Figure 4. Cell cycle associated signature analysis

Gene set enrichment analysis results in (a) HRpos patients; (b) TNBC patients comparing PFS6-responders and PFS6-nonresponders, showing E2F target and G2M checkpoint pathways are significantly enriched in PFS6-nonresponders. (c) Kaplan-Meier curves showing PFS according to E2F targets enrichment scores in the TNBC and (d) HRpos patients.

## Supplementary Figure 5

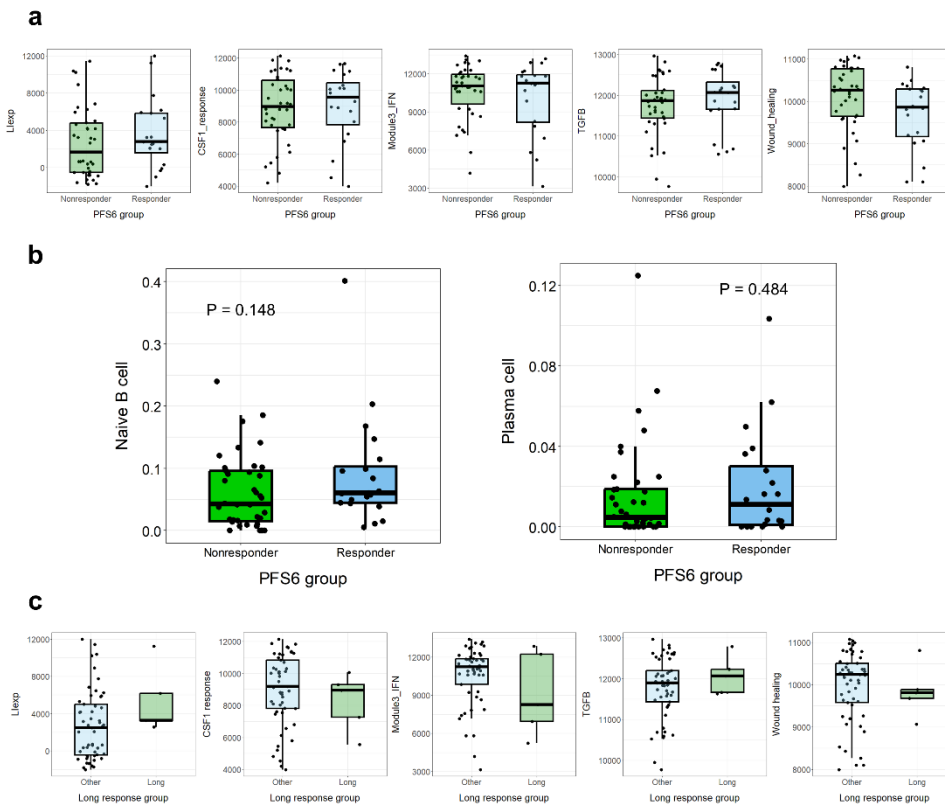

**Supplementary Figure 5. Immune-related signatures and PFS6 response**

(a) Boxplots showing enrichment scores of major immune-related signatures according to PFS6 groups (b) Box plots showing the naïve B-cell and plasma cell infiltration proportions according to the PFS6 groups. Each dot represents each patient. The p-value is shown. (c) Boxplots showing enrichment scores of major immune-related signatures comparing between long responders and others.

**SUPPLEMENTARY TABLES**

**Supplementary Table 1.** Mutation results

| Sample id | chrNum | Gene   | tumorVaf | hgvsPcode            |
|-----------|--------|--------|----------|----------------------|
| 128-01    | chr17  | TP53   | 0.104    | p.Thr170ProfsTer4    |
| 128-03    | chr17  | TP53   | 0.695    | p.Arg213Ter          |
| 128-03    | chr3   | FANCD2 | 0.212    |                      |
| 128-04    | chr3   | PIK3CA | 0.755    | p.His1047Arg         |
| 128-04    | chr6   | ESR1   | 0.211    | p.Tyr537Ser          |
| 128-04    | chr7   | KMT2C  | 0.18     | p.Ala1685Ser         |
| 128-04    | chr17  | TP53   | 0.627    | p.Arg196Ter          |
| 128-04    | chr3   | FANCD2 | 0.174    |                      |
| 128-04    | chr10  | GATA3  | 0.31     | p.Thr323AspfsTer30   |
| 128-05    | chr17  | TP53   | 0.532    | p.Tyr220Cys          |
| 128-05    | chr3   | PIK3CA | 0.313    | p.Glu542Lys          |
| 128-05    | chr5   | RAD50  | 0.0504   | p.Asn934IlefsTer6    |
| 128-06    | chr9   | NOTCH1 | 0.063    | p.Ser2486ArgfsTer103 |
| 128-06    | chr17  | TP53   | 0.588    | p.Pro75GlyfsTer65    |
| 128-07    | chr17  | TP53   | 0.71     | p.Arg248Trp          |
| 128-07    | chr2   | BARD1  | 0.155    | p.Glu301AlafsTer13   |
| 128-07    | chr12  | TBX3   | 0.149    |                      |
| 128-08    | chr17  | TP53   | 0.299    | p.Val172Phe          |
| 128-09    | chr17  | TP53   | 0.4      | p.Arg282Trp          |
| 128-09    | chr6   | HLA-C  | 0.105    |                      |
| 128-09    | chr6   | HLA-B  | 0.174    |                      |
| 128-01    | chr17  | TP53   | 0.803    | p.Tyr107Ter          |
| 128-01    | chr2   | DNMT3A | 0.786    | p.Tyr623ThrfsTer28   |
| 128-01    | chr19  | ERCC2  | 0.0417   | p.Leu183AlafsTer24   |
| 128-11    | chr17  | TP53   | 0.41     | p.Gly262Val          |
| 128-11    | chr17  | ERBB2  | 0.659    | p.Val777Leu          |
| 128-11    | chr3   | PIK3CA | 0.311    | p.His1047Arg         |
| 128-11    | chr3   | TGFBR2 | 0.0637   | p.Lys153SerfsTer35   |
| 128-14    | chr16  | GRIN2A | 0.28     | p.Trp1014Ter         |
| 128-14    | chr17  | TP53   | 0.508    | p.Arg342Ter          |
| 128-15    | chr3   | PIK3CA | 0.275    | p.His1047Leu         |
| 128-15    | chr17  | TP53   | 0.631    | p.Cys124LeufsTer25   |
| 128-16    | chr17  | TP53   | 0.525    | p.Arg248Gln          |
| 128-18    | chr3   | PIK3CA | 0.149    | p.His1047Arg         |
| 128-18    | chr5   | MAP3K1 | 0.101    | p.Gln1424Ter         |
| 128-20    | chr9   | PAX5   | 0.0583   | p.Ala322LeufsTer11   |

|        |       |        |        |                          |
|--------|-------|--------|--------|--------------------------|
| 128-20 | chr19 | BBC3   | 0.0667 | p.Gly242AlafsTer48       |
| 128-21 | chr12 | KRAS   | 0.323  | p.Gly12Asp               |
| 128-21 | chr17 | TP53   | 0.6    | p.His179Tyr              |
| 128-21 | chr9  | GNAQ   | 0.0417 | p.Thr96Ser               |
| 128-21 | chr3  | TGFBR2 | 0.0933 | p.Lys153SerfsTer35       |
| 128-22 | chr10 | GATA3  | 0.268  | p.Pro409AlafsTer99       |
| 128-22 | chr10 | PTEN   | 0.227  | p.Thr319Ter              |
| 128-22 | chr20 | ASXL1  | 0.0721 | p.Gly645ValfsTer58       |
| 128-23 | chr3  | PIK3CA | 0.458  | p.His1047Arg             |
| 128-23 | chr6  | ESR1   | 0.515  | p.Glu380Gln              |
| 128-23 | chr1  | ARID1A | 0.226  | p.Pro989ValfsTer51       |
| 128-24 | chr6  | ESR1   | 0.69   | p.Leu536Pro              |
| 128-24 | chr7  | KMT2C  | 0.09   | p.Arg904Ter              |
| 128-24 | chr9  | GNAQ   | 0.105  | p.Thr96Ser               |
| 128-24 | chr7  | KMT2C  | 0.167  |                          |
| 128-25 | chr17 | TP53   | 0.442  | p.Leu252_Ile254del       |
| 129-01 | chr17 | TP53   | 0.222  | p.Gly245Ser              |
| 129-01 | chr3  | PIK3CA | 0.367  | p.Glu542Lys              |
| 129-01 | chr17 | NF1    | 0.169  | p.Tyr2285ThrfsTer5       |
| 129-02 | chr6  | ESR1   | 0.209  | p.Tyr537Asn              |
| 129-02 | chr9  | GNAQ   | 0.0548 | p.Thr96Ser               |
| 129-02 | chr10 | GATA3  | 0.359  |                          |
| 129-03 | chr7  | EZH2   | 0.0678 | p.Pro214HisfsTer27       |
| 129-03 | chr17 | TP53   | 0.833  | p.Ser241ProfTer6         |
| 129-04 | chr9  | GNAQ   | 0.114  | p.Thr96Ser               |
| 129-04 | chr9  | TSC1   | 0.108  |                          |
| 129-04 | chr17 | TP53   | 0.374  | p.Asp281_Leu289delinsVal |
| 129-05 | chr17 | TP53   | 0.371  | p.Cys135Phe              |
| 129-05 | chr3  | PIK3CA | 0.465  | p.His1047Arg             |
| 129-06 | chr1  | BCL10  | 0.0651 | p.Ile46TyrfsTer24        |
| 129-06 | chr5  | PIK3R1 | 0.758  | p.Leu609IlefsTer54       |
| 129-06 | chr16 | CREBBP | 0.414  | p.Gln442LysfsTer28       |
| 129-06 | chr17 | TP53   | 0.675  | p.Thr150_Pro151dup       |
| 129-09 | chr17 | TP53   | 0.214  | p.Cys141Tyr              |
| 129-09 | chr3  | FANCD2 | 0.103  |                          |
| 129-09 | chrX  | AR     | 0.126  | p.Leu57Gln               |
| 129-09 | chr5  | PIK3R1 | 0.16   | p.Asn344MetfsTer29       |
| 129-09 | chr7  | KMT2C  | 0.338  |                          |
| 129-10 | chr9  | TGFBR1 | 0.294  |                          |

|        |       |         |        |                     |
|--------|-------|---------|--------|---------------------|
| 129-10 | chr7  | KMT2C   | 0.33   |                     |
| 129-10 | chr17 | TP53    | 0.19   | p.Gly59ValfsTer64   |
| 130-02 | chr17 | TP53    | 0.43   | p.Arg273His         |
| 130-04 | chr15 | SMAD3   | 0.36   | p.Arg243His         |
| 130-04 | chr17 | ACTG1   | 0.127  |                     |
| 130-06 | chr6  | ESR1    | 0.266  | p.Tyr537Asn         |
| 130-09 | chr17 | TP53    | 0.5    | p.Phe109TrpfsTer41  |
| 130-10 | chr3  | PIK3CA  | 0.327  | p.Met1043Ile        |
| 130-10 | chr6  | ESR1    | 0.385  | p.Tyr537Ser         |
| 132-01 | chr14 | AKT1    | 0.551  | p.Glu17Lys          |
| 132-01 | chr17 | TP53    | 0.396  | p.Ser241Phe         |
| 132-01 | chr9  | GNAQ    | 0.177  | p.Thr96Ser          |
| 142-02 | chr1  | FH      | 0.225  | p.Ser11Ter          |
| 142-02 | chr11 | ATM     | 0.0541 |                     |
| 142-02 | chr17 | TP53    | 0.386  | p.Arg213Ter         |
| 142-02 | chr9  | GNAQ    | 0.167  | p.Thr96Ser          |
| 166-01 | chr14 | AKT1    | 0.117  | p.Glu17Lys          |
| 166-01 | chr16 | ANKRD11 | 0.0166 | p.Lys369Arg         |
| 166-01 | chr6  | ESR1    | 0.109  | p.Asp538Gly         |
| 166-01 | chr10 | GATA3   | 0.103  | p.Ter445LeufsTer63  |
| 166-02 | chr17 | TP53    | 0.387  | p.Tyr163Cys         |
| 166-02 | chr22 | NF2     | 0.325  | p.Gln470Ter         |
| 170-01 | chr17 | TP53    | 0.0378 | p.Tyr163Cys         |
| 170-01 | chr11 | INPPL1  | 0.188  | p.Gly12AlafsTer15   |
| 170-02 | chr6  | ESR1    | 0.619  | p.Asp538Gly         |
| 170-03 | chr13 | LATS2   | 0.153  | p.Pro479_Ala480dup  |
| 170-03 | chr14 | FOXA1   | 0.2    | p.Ala353GlufsTer9   |
| 170-03 | chr17 | TP53    | 0.0789 | p.Ser362AlafsTer8   |
| 170-04 | chr17 | TP53    | 0.154  | p.Arg175His         |
| 170-04 | chr3  | PIK3CA  | 0.154  | p.His1047Arg        |
| 170-05 | chr17 | TP53    | 0.155  | p.Cys242Trp         |
| 170-05 | chr9  | NOTCH1  | 0.0851 | p.Ile870ThrfsTer301 |
| 170-06 | chr1  | MUTYH   | 0.0533 | p.Gln264Ter         |
| 170-06 | chr17 | TP53    | 0.239  | p.Cys135Trp         |
| 170-06 | chr7  | EGFR    | 0.0361 | p.Arg521Lys         |
| 170-06 | chr9  | GNAQ    | 0.265  | p.Thr96Ser          |
| 170-06 | chr1  | ERRFI1  | 0.0629 | p.Cys146Ter         |
| 170-06 | chr10 | TCF7L2  | 0.108  | p.Cys469ValfsTer8   |
| 170-06 | chr12 | EP400   | 0.0368 | p.Thr2552ProfsTer43 |



|        |       |        |        |                     |
|--------|-------|--------|--------|---------------------|
| 170-06 | chr19 | KMT2B  | 0.0508 | p.Pro2138ArgfsTer15 |
| H14-01 | chr17 | TP53   | 0.262  | p.Gly245Asp         |
| H14-01 | chr9  | GNAQ   | 0.0577 | p.Thr96Ser          |
| H14-01 | chr13 | LATS2  | 0.1    | p.Pro479_Ala480dup  |
| H14-02 | chr17 | TP53   | 0.58   | p.Leu130His         |
| H14-02 | chr17 | NF1    | 0.603  | p.Gln1235Ter        |
| H14-02 | chr2  | INHA   | 0.0976 |                     |
| H14-02 | chr3  | PIK3CA | 0.743  | p.Glu545Lys         |
| H14-02 | chr7  | KMT2C  | 0.322  | p.Ser1824Ter        |
| H14-02 | chr1  | ARID1A | 0.346  | p.Gly1644TrpfsTer4  |
| H14-02 | chr5  | MAP3K1 | 0.331  | p.Met472IlefsTer9   |
| H14-02 | chr5  | MAP3K1 | 0.282  | p.Ser696Ter         |
| H14-03 | chr17 | TP53   | 0.174  | p.Gln144His         |
| H14-03 | chr17 | TP53   | 0.17   | p.Gln144Pro         |
| H14-03 | chr9  | GNAQ   | 0.241  | p.Thr96Ser          |
| H14-03 | chr10 | GATA3  | 0.113  | p.Pro409AlafsTer99  |
| H14-05 | chr16 | GRIN2A | 0.133  | p.Ser944Ter         |
| H14-05 | chr3  | PIK3CA | 0.11   | p.His1047Arg        |
| H14-05 | chr6  | ESR1   | 0.291  | p.Glu380Gln         |
| H14-05 | chr7  | KMT2C  | 0.107  | p.Arg904Ter         |
| H14-05 | chr9  | GNAQ   | 0.0755 | p.Thr96Ser          |
| H14-05 | chr17 | TP53   | 0.244  | p.Ser241ProfsTer6   |
| H14-06 | chr3  | PIK3CA | 0.184  | p.His1047Arg        |
| H14-06 | chr3  | TGFBR2 | 0.0526 | p.Lys153SerfsTer35  |
| H14-06 | chr10 | ARID5B | 0.0195 | p.Lys1027ArgfsTer8  |
| H14-06 | chr13 | LATS2  | 0.2    | p.Pro479_Ala480dup  |
| H14-06 | chr17 | TP53   | 0.434  | p.Gly59ArgfsTer2    |
| H14-08 | chr11 | ATM    | 0.111  | p.Ala59Asp          |
| H14-08 | chr11 | KMT2A  | 0.136  | p.Cys1189Ter        |
| H14-08 | chr13 | BRCA2  | 0.161  | p.Ser942Ter         |
| H14-08 | chr5  | MSH3   | 0.0678 |                     |
| H14-08 | chr5  | RAD50  | 0.1    |                     |
| H14-08 | chr6  | ESR1   | 0.329  | p.Asp538Gly         |
| H14-08 | chr9  | GNAQ   | 0.17   | p.Thr96Ser          |
| H14-08 | chr9  | KLF4   | 0.0638 | p.Glu323Ter         |
| H14-09 | chr17 | TP53   | 0.0733 | p.Gln192Ter         |
| H14-11 | chr11 | KMT2A  | 0.235  |                     |
| H14-11 | chr17 | TP53   | 0.448  | p.Arg337Leu         |
| H14-11 | chr17 | RNF43  | 0.0968 | p.Tyr89Ter          |

|        |       |        |        |                    |
|--------|-------|--------|--------|--------------------|
| H14-11 | chr19 | CIC    | 0.0779 | p.Arg1512Leu       |
| H14-11 | chr3  | PIK3CA | 0.853  | p.Glu542Lys        |
| H14-11 | chr3  | PIK3CA | 0.868  | p.Glu726Lys        |
| H14-11 | chr6  | HLA-A  | 0.222  |                    |
| H14-11 | chr6  | EPHA7  | 0.148  |                    |
| H14-11 | chr7  | KMT2C  | 0.222  | p.Arg904Ter        |
| H14-11 | chr9  | GNAQ   | 0.258  | p.Thr96Ser         |
| H14-11 | chr6  | ARID1B | 0.0674 | p.Gly734AlafsTer11 |
| H14-11 | chr8  | ESCO2  | 0.174  | p.Thr254AsnfsTer27 |
| H14-11 | chr13 | LATS2  | 0.0758 | p.Pro479_Ala480dup |
| H14-12 | chr1  | SESN2  | 0.0782 | p.Glu135Ter        |
| H14-12 | chr17 | TP53   | 0.0909 |                    |
| H14-12 | chr3  | PIK3CA | 0.0611 | p.His1047Arg       |
| H14-12 | chr1  | SPEN   | 0.0128 | p.Arg986AlafsTer24 |
| H14-13 | chr5  | SDHA   | 0.393  | p.Leu649GluufsTer4 |
| H14-13 | chr17 | TP53   | 0.633  | p.Asp148IlefsTer22 |
| H14-14 | chr17 | TP53   | 0.0576 | p.Tyr220Cys        |
| H14-14 | chr17 | NF1    | 0.0684 | p.Gln1399Ter       |
| H14-14 | chr3  | PIK3CA | 0.0571 | p.Cys378Phe        |
| H14-14 | chr3  | MLH1   | 0.0741 | p.Leu348AlafsTer21 |
| H14-16 | chr17 | ERBB2  | 0.236  | p.Asp769Tyr        |
| H14-17 | chr1  | ARID1A | 0.705  | p.Gln379Ter        |
| H14-17 | chr11 | MRE11A | 0.0833 |                    |
| H14-17 | chr12 | ARID2  | 0.294  | p.Gln1100Ter       |
| H14-17 | chr3  | FOXP1  | 0.387  |                    |
| H14-17 | chr7  | KMT2C  | 0.103  | p.Cys391Ter        |
| H14-17 | chr1  | BCL10  | 0.0851 | p.Ile46TyrfsTer24  |
| H14-17 | chr5  | PIK3R1 | 0.143  | p.Arg577_Leu581del |
| H14-17 | chr16 | CBFB   | 0.531  |                    |
| H14-17 | chr16 | CDH1   | 0.628  | p.Phe486LeufsTer31 |
| H14-17 | chr17 | NF1    | 0.546  | p.Phe1708LeufsTer2 |
| H14-18 | chr17 | TP53   | 0.631  | p.Pro278Arg        |
| H14-18 | chr9  | CDKN2A | 0.545  | p.Tyr44Ter         |
| H14-19 | chr12 | KMT2D  | 0.111  | p.Gln3919Ter       |
| H14-19 | chr3  | MLH1   | 0.0842 | p.Val384Asp        |
| H14-19 | chr3  | MLH1   | 0.0882 |                    |
| H14-19 | chr6  | CDKN1A | 0.0479 | p.Ser31Arg         |
| H14-19 | chr9  | GNAQ   | 0.0833 | p.Thr96Ser         |
| H14-20 | chr3  | PIK3CA | 0.288  | p.Glu545Lys        |

|        |       |         |        |                     |
|--------|-------|---------|--------|---------------------|
| H14-20 | chr15 | TP53BP1 | 0.0877 |                     |
| H14-21 | chr14 | AKT1    | 0.844  | p.Glu17Lys          |
| H14-21 | chr9  | CDKN2A  | 0.67   | p.Arg80Ter          |
| H14-21 | chr6  | HLA-A   | 0.303  | p.Asp251ThrfsTer46  |
| H14-21 | chr10 | BMPR1A  | 0.0575 |                     |
| H14-21 | chr11 | BIRC3   | 0.0526 | p.Cys572LeufsTer5   |
| H14-21 | chr19 | ARID3A  | 0.111  | p.Gly37AlafsTer87   |
| H16-01 | chr1  | BCL10   | 0.0741 | p.Ile46TyrfsTer24   |
| H16-01 | chr5  | MSH3    | 0.0741 | p.Asn385GlnfsTer19  |
| H16-01 | chr5  | RAD50   | 0.103  | p.Asn934IlefsTer6   |
| H16-01 | chr17 | TP53    | 0.676  | p.His115AlafsTer34  |
| H16-02 | chr9  | GNAQ    | 0.128  | p.Thr96Ser          |
| H16-02 | chr17 | TP53    | 0.37   | p.Gly302ArgfsTer4   |
| H16-02 | chr22 | EP300   | 0.0431 | p.Gln577IlefsTer23  |
| H16-03 | chr3  | PIK3CA  | 0.0588 | p.His1047Arg        |
| H16-03 | chr5  | NSD1    | 0.0508 | p.Ser2693Ter        |
| H16-05 | chr17 | TP53    | 0.302  | p.Ile195Phe         |
| H16-06 | chr1  | PIK3R3  | 0.0563 | p.Arg309Ter         |
| H16-06 | chr14 | AKT1    | 0.609  | p.Glu17Lys          |
| H16-06 | chr4  | FBXW7   | 0.0784 | p.Gln242Ter         |
| H16-06 | chr15 | BLM     | 0.0741 | p.Asn515MetfsTer16  |
| H16-07 | chr17 | TP53    | 0.905  | p.Pro278Leu         |
| H16-07 | chr9  | GNAQ    | 0.182  | p.Thr96Ser          |
| H16-07 | chr16 | ANKRD11 | 0.0602 | p.Pro1926ArgfsTer37 |
| H16-08 | chr15 | TP53BP1 | 0.233  | p.Glu1170Ter        |
| H16-08 | chr7  | KMT2C   | 0.151  | p.Leu762Ter         |
| H16-08 | chr9  | GNAQ    | 0.262  | p.Thr96Ser          |
| H16-09 | chr14 | AKT1    | 0.439  | p.Glu17Lys          |
| H16-09 | chr17 | TP53    | 0.454  |                     |
| H16-09 | chr17 | NF1     | 0.393  |                     |
| H16-09 | chr18 | SMAD4   | 0.458  | p.Gln83Ter          |
| H16-09 | chr4  | REST    | 0.469  | p.Glu167Ter         |
| H16-09 | chr7  | BRAF    | 0.365  | p.Gly466Ala         |
| H16-09 | chr9  | GNAQ    | 0.107  | p.Thr96Ser          |
| H16-09 | chr11 | MEN1    | 0.0247 |                     |
| H16-09 | chr16 | ZFH3    | 0.137  | p.Ser3596ArgfsTer70 |
| H16-10 | chr14 | AKT1    | 0.212  | p.Glu17Lys          |
| H16-10 | chr17 | TP53    | 0.124  | p.Glu285Lys         |
| H16-11 | chrX  | BCORL1  | 0.116  | p.Gln856Ter         |

|        |       |        |        |                     |
|--------|-------|--------|--------|---------------------|
| H16-11 | chr17 | MAP2K4 | 0.471  | p.Cys382ValfsTer31  |
| H16-13 | chr17 | TP53   | 0.163  | p.Val157Phe         |
| H16-13 | chr15 | BLM    | 0.066  | p.Asn515LysfsTer2   |
| H16-14 | chr17 | TP53   | 0.177  | p.Gly266Val         |
| H16-14 | chr9  | GNAQ   | 0.109  | p.Thr96Ser          |
| H16-14 | chrX  | KDM5C  | 0.0778 | p.Glu465ArgfsTer52  |
| H16-14 | chr8  | ESCO2  | 0.105  | p.Thr254AsnfsTer27  |
| H16-14 | chr10 | PTEN   | 0.148  | p.Lys13ProfsTer2    |
| H16-16 | chr13 | BRCA2  | 0.325  | p.Asn372His         |
| H16-16 | chr6  | HLA-A  | 0.781  | p.Leu180Trp         |
| H16-16 | chr6  | HLA-A  | 0.184  | p.Trp228Ter         |
| H16-16 | chr7  | PMS2   | 0.158  | p.Gly857Ala         |
| H16-16 | chr7  | KMT2C  | 0.253  | p.Ala1685Ser        |
| H16-16 | chr9  | GNAQ   | 0.192  | p.Thr96Ser          |
| H16-16 | chrX  | AR     | 0.273  | p.Leu57Gln          |
| H16-16 | chr5  | SDHA   | 0.0917 | p.Leu649GlufsTer4   |
| H16-16 | chr10 | GATA3  | 0.368  | p.Pro409AlafsTer99  |
| H16-16 | chr10 | TCF7L2 | 0.0777 | p.Cys469ValfsTer8   |
| H16-17 | chr17 | TP53   | 0.342  | p.Val272Met         |
| H16-17 | chr3  | PIK3CA | 0.297  | p.Glu545Lys         |
| H16-17 | chr9  | GNAQ   | 0.0952 | p.Thr96Ser          |
| H16-17 | chr7  | KMT2C  | 0.267  |                     |
| H16-17 | chr10 | PTEN   | 0.395  | p.Glu242Ter         |
| H16-17 | chr16 | ZFH3   | 0.117  | p.Ser3596ArgfsTer70 |
| H16-18 | chr16 | ZFH3   | 0.439  | p.Ser2600Ter        |
| H16-18 | chr17 | TP53   | 0.35   |                     |
| H16-18 | chr3  | PIK3CA | 0.554  | p.His1047Arg        |
| H16-18 | chr7  | BRAF   | 0.31   | p.Gly469Ala         |
| H16-18 | chr9  | GNAQ   | 0.321  | p.Thr96Ser          |
| H16-18 | chrX  | AR     | 0.302  | p.Leu57Gln          |
| H16-18 | chr12 | RECQL  | 0.0984 | p.Val41SerfsTer14   |
| H16-18 | chr14 | MAX    | 0.427  | p.Lys104ArgfsTer66  |
| H16-20 | chr14 | AKT1   | 0.474  | p.Glu17Lys          |
| H16-20 | chr17 | TP53   | 0.484  | p.Pro151Ser         |
| H16-20 | chr7  | KMT2C  | 0.0654 | p.Arg904Ter         |
| H16-20 | chr9  | GNAQ   | 0.169  | p.Thr96Ser          |
| H16-20 | chr13 | DIS3   | 0.023  | p.Val105TyrfsTer8   |

**Supplementary Table 2.** Single gene mutation association with PFS6 rate or PFS

| Gene           | Fisher test p-value for PFS6 rate | Log-rank test p-value for PFS | Frequency |
|----------------|-----------------------------------|-------------------------------|-----------|
| <i>TP53</i>    | 0.037                             | 0.045                         | 53        |
| <i>GNAQ</i>    | 0.794                             | 0.602                         | 22        |
| <i>PIK3CA</i>  | 1.000                             | 0.920                         | 20        |
| <i>KMT2C</i>   | 1.000                             | 0.732                         | 12        |
| <i>ESR1</i>    | 0.484                             | 0.808                         | 10        |
| <i>AKT1</i>    | 0.704                             | 0.826                         | 7         |
| <i>GATA3</i>   | 0.664                             | 0.927                         | 6         |
| <i>NF1</i>     | 0.059                             | 0.215                         | 5         |
| <i>LATS2</i>   | 1.000                             | 0.959                         | 4         |
| <i>AR</i>      | 1.000                             | 0.239                         | 3         |
| <i>ARID1A</i>  | 0.551                             | 0.282                         | 3         |
| <i>BCL10</i>   | 1.000                             | 0.341                         | 3         |
| <i>FANCD2</i>  | 0.293                             | 0.227                         | 3         |
| <i>HLA.A</i>   | 1.000                             | 0.658                         | 3         |
| <i>PIK3R1</i>  | 1.000                             | 0.549                         | 3         |
| <i>PTEN</i>    | 0.293                             | 0.416                         | 3         |
| <i>RAD50</i>   | 1.000                             | 0.539                         | 3         |
| <i>TGFBR2</i>  | 0.293                             | 0.013                         | 3         |
| <i>ZFHX3</i>   | 1.000                             | 0.591                         | 3         |
| <i>ANKRD11</i> | 1.000                             | 0.723                         | 2         |
| <i>ATM</i>     | 1.000                             | 0.376                         | 2         |
| <i>BLM</i>     | 1.000                             | 0.098                         | 2         |
| <i>BRAF</i>    | 1.000                             | 0.989                         | 2         |
| <i>BRCA2</i>   | 0.133                             | 0.807                         | 2         |
| <i>CDKN2A</i>  | 0.528                             | 0.437                         | 2         |
| <i>ERBB2</i>   | 1.000                             | 0.367                         | 2         |
| <i>ESCO2</i>   | 0.528                             | 0.543                         | 2         |
| <i>GRIN2A</i>  | 1.000                             | 0.939                         | 2         |
| <i>KMT2A</i>   | 1.000                             | 0.881                         | 2         |
| <i>MAP3K1</i>  | 1.000                             | 0.848                         | 2         |
| <i>MLH1</i>    | 1.000                             | 0.916                         | 2         |
| <i>MSH3</i>    | 1.000                             | 0.938                         | 2         |
| <i>NOTCH1</i>  | 0.528                             | 0.172                         | 2         |
| <i>SDHA</i>    | 1.000                             | 0.589                         | 2         |
| <i>TCF7L2</i>  | 1.000                             | 0.965                         | 2         |
| <i>TP53BP1</i> | 0.133                             | 0.123                         | 2         |
| <i>ACTG1</i>   | 1.000                             | 0.019                         | 1         |

|               |       |       |   |
|---------------|-------|-------|---|
| <i>ARID1B</i> | 1.000 | 0.785 | 1 |
| <i>ARID2</i>  | 0.368 | 0.122 | 1 |
| <i>ARID3A</i> | 1.000 | 0.130 | 1 |
| <i>ARID5B</i> | 1.000 | 0.724 | 1 |
| <i>ASXL1</i>  | 1.000 | 0.523 | 1 |
| <i>BARD1</i>  | 1.000 | 0.360 | 1 |
| <i>BBC3</i>   | 1.000 | 0.510 | 1 |
| <i>BCORL1</i> | 0.368 | 0.704 | 1 |
| <i>BIRC3</i>  | 1.000 | 0.130 | 1 |
| <i>BMPRIA</i> | 1.000 | 0.130 | 1 |
| <i>CBFB</i>   | 0.368 | 0.122 | 1 |
| <i>CDH1</i>   | 0.368 | 0.122 | 1 |
| <i>CDKN1A</i> | 0.368 | 0.555 | 1 |
| <i>CIC</i>    | 1.000 | 0.785 | 1 |
| <i>CREBBP</i> | 1.000 | 0.693 | 1 |
| <i>DIS3</i>   | 1.000 | 0.633 | 1 |
| <i>DNMT3A</i> | 0.368 | 0.261 | 1 |
| <i>EGFR</i>   | 1.000 | 0.755 | 1 |
| <i>EP300</i>  | 0.368 | 0.122 | 1 |
| <i>EP400</i>  | 1.000 | 0.755 | 1 |
| <i>EPHA7</i>  | 1.000 | 0.785 | 1 |
| <i>ERCC2</i>  | 0.368 | 0.261 | 1 |
| <i>ERRF11</i> | 1.000 | 0.755 | 1 |
| <i>EZH2</i>   | 1.000 | 0.041 | 1 |
| <i>FBXW7</i>  | 1.000 | 0.567 | 1 |
| <i>FH</i>     | 1.000 | 0.000 | 1 |
| <i>FOXA1</i>  | 1.000 | 0.567 | 1 |
| <i>FOXP1</i>  | 0.368 | 0.122 | 1 |
| <i>HLA.B</i>  | 1.000 | 0.089 | 1 |
| <i>HLA.C</i>  | 1.000 | 0.089 | 1 |
| <i>INHA</i>   | 0.368 | 0.807 | 1 |
| <i>INPPL1</i> | 1.000 | 0.479 | 1 |
| <i>KDM5C</i>  | 1.000 | 0.541 | 1 |
| <i>KLF4</i>   | 0.368 | 0.969 | 1 |
| <i>KMT2B</i>  | 1.000 | 0.755 | 1 |
| <i>KMT2D</i>  | 0.368 | 0.555 | 1 |
| <i>KRAS</i>   | 1.000 | 0.000 | 1 |
| <i>MAP2K4</i> | 0.368 | 0.704 | 1 |
| <i>MAX</i>    | 1.000 | 0.029 | 1 |

|               |       |       |   |
|---------------|-------|-------|---|
| <i>MEN1</i>   | 0.368 | 0.516 | 1 |
| <i>MRE11A</i> | 0.368 | 0.122 | 1 |
| <i>MUTYH</i>  | 1.000 | 0.755 | 1 |
| <i>NF2</i>    | 1.000 | 0.390 | 1 |
| <i>NSD1</i>   | 0.368 | 0.122 | 1 |
| <i>PAX5</i>   | 1.000 | 0.510 | 1 |
| <i>PIK3R3</i> | 1.000 | 0.567 | 1 |
| <i>PMS2</i>   | 0.368 | 0.773 | 1 |
| <i>RECQL</i>  | 1.000 | 0.029 | 1 |
| <i>REST</i>   | 0.368 | 0.516 | 1 |
| <i>RNF43</i>  | 1.000 | 0.785 | 1 |
| <i>SESN2</i>  | 0.368 | 0.937 | 1 |
| <i>SMAD3</i>  | 1.000 | 0.019 | 1 |
| <i>SMAD4</i>  | 0.368 | 0.516 | 1 |
| <i>SPEN</i>   | 0.368 | 0.937 | 1 |
| <i>TBX3</i>   | 1.000 | 0.360 | 1 |
| <i>TGFBR1</i> | 1.000 | 0.055 | 1 |
| <i>TSC1</i>   | 0.368 | 0.670 | 1 |
